# Supplementary material
Source: PubMed Central journal article supplement (PMC3251083)
Supplement: 1112664108_pnas.201112664SI.pdf [file 1112664108_pnas.201112664SI.pdf]

# Supporting Information

Matoba et al. 10.1073/pnas.1112664108

## SI Text

We also sought to explore the possibilities of further improvements to cloning efficiency in mice. Our recent cloning experiments using *Xist*-knockout donors revealed the presence of discrete groups of X-linked genes that showed *Xist*-independent down-regulation in cloned embryos (1). These were the *Xlr* and *Magea* family genes located at positions showing enhanced dimethylation of histone H3 at lysine 9 (H3K9me2), a repressive histone modification needed for the formation of constitutive heterochromatin in somatic cells (2). These genes were inactivated in cloned embryos and could not be rescued by *Xist* knockout (1). Therefore, in the last series of experiments, we examined whether RNAi of the genes coding enzymes responsible for the establishment of H3K9me2 could ameliorate the repressive state of the *Xlr* and *Magea* genes in cloned embryos. Gene expression analysis by DNA microarray using single

cloned blastocysts revealed that, although the genes for *G9a* (*Ehmt2*) and *Glp* (*Ehmt1*), the primary H3K9 methyltransferases (3), were successfully down-regulated by specific siRNA injection, the *Xlr* and *Magea* family genes remained fully repressed (Fig. S3). Embryo transfer experiments also revealed that the same siRNA injection had no significant effect on the development of clones (Table S3). We next injected mRNA for *Jhdm2a*, an H3K9-specific demethylase (4), to promote demethylation of H3K9me2, but this resulted in a remarkable decrease in the developmental ability of cloned embryos within 72 h. These findings indicate that, unlike the X chromosome inactivation induced by ectopic *Xist* RNA, the somatic cell-specific gene silencing by H3K9me2 might not be reversed easily by siRNA or mRNA injections, possibly because of the presence of mechanisms that maintain the repressive chromatin state redundantly.

1. Inoue K, et al. (2010) Impeding *Xist* expression from the active X chromosome improves mouse somatic cell nuclear transfer. *Science* 330:496–499.
2. Wen B, Wu H, Shinkai Y, Irizarry RA, Feinberg AP (2009) Large histone H3 lysine 9 dimethylated chromatin blocks distinguish differentiated from embryonic stem cells. *Nat Genet* 41:246–250.

3. Shinkai Y, Tachibana M (2011) H3K9 methyltransferase G9a and the related molecule GLP. *Genes Dev* 25:781–788.
4. Yamane K, et al. (2006) JHDM2A, a JmjC-containing H3K9 demethylase, facilitates transcription activation by androgen receptor. *Cell* 125:483–495.

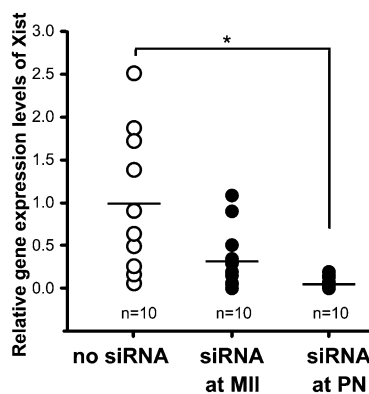

**Fig. S1.** Examination of the effect of a specific siRNA on *Xist* RNA level in parthenogenetically activated embryos following siRNA injection at different timings. An siRNA construct (Methods) was injected into oocytes before or after parthenogenetic activation, and the expression levels of *Xist* RNA were determined by quantitative RT-PCR at 96 h after activation. The horizontal lines in each group indicate mean values. *Xist* RNA level was effectively decreased when injected at 6 h postactivation (pronuclear stage; PN) but not before activation (metaphase II; MII) (\* $P < 0.05$  by Student's *t* test).

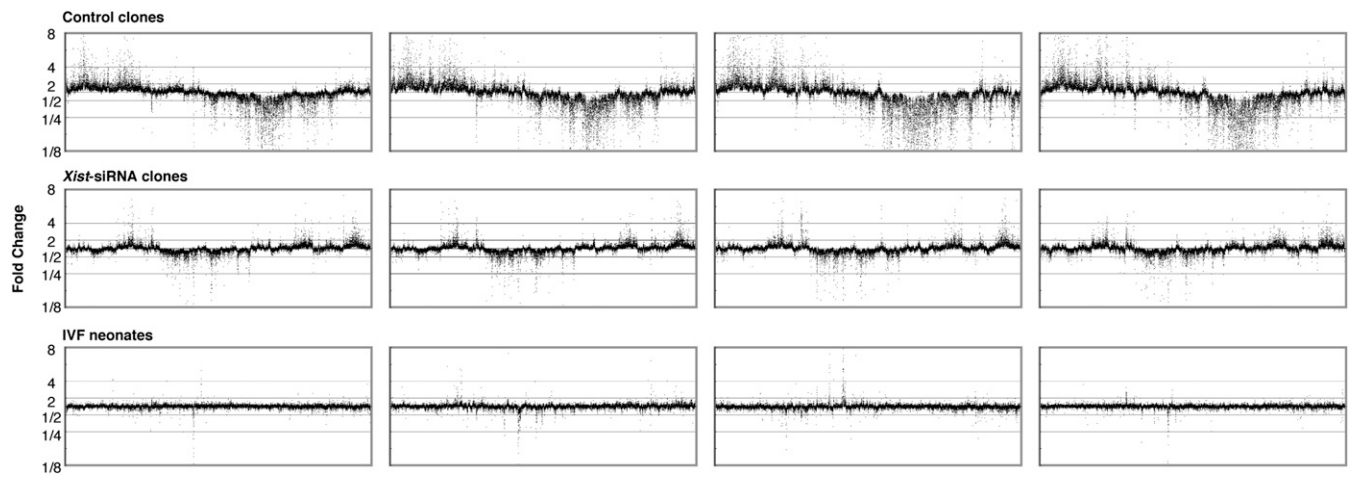

**Fig. S2.** Gene expression profiles from the liver of Sertoli cell-derived cloned mice and in vitro fertilization (IVF)-derived mice at birth. Each panel represents data from one cloned or IVF individual.

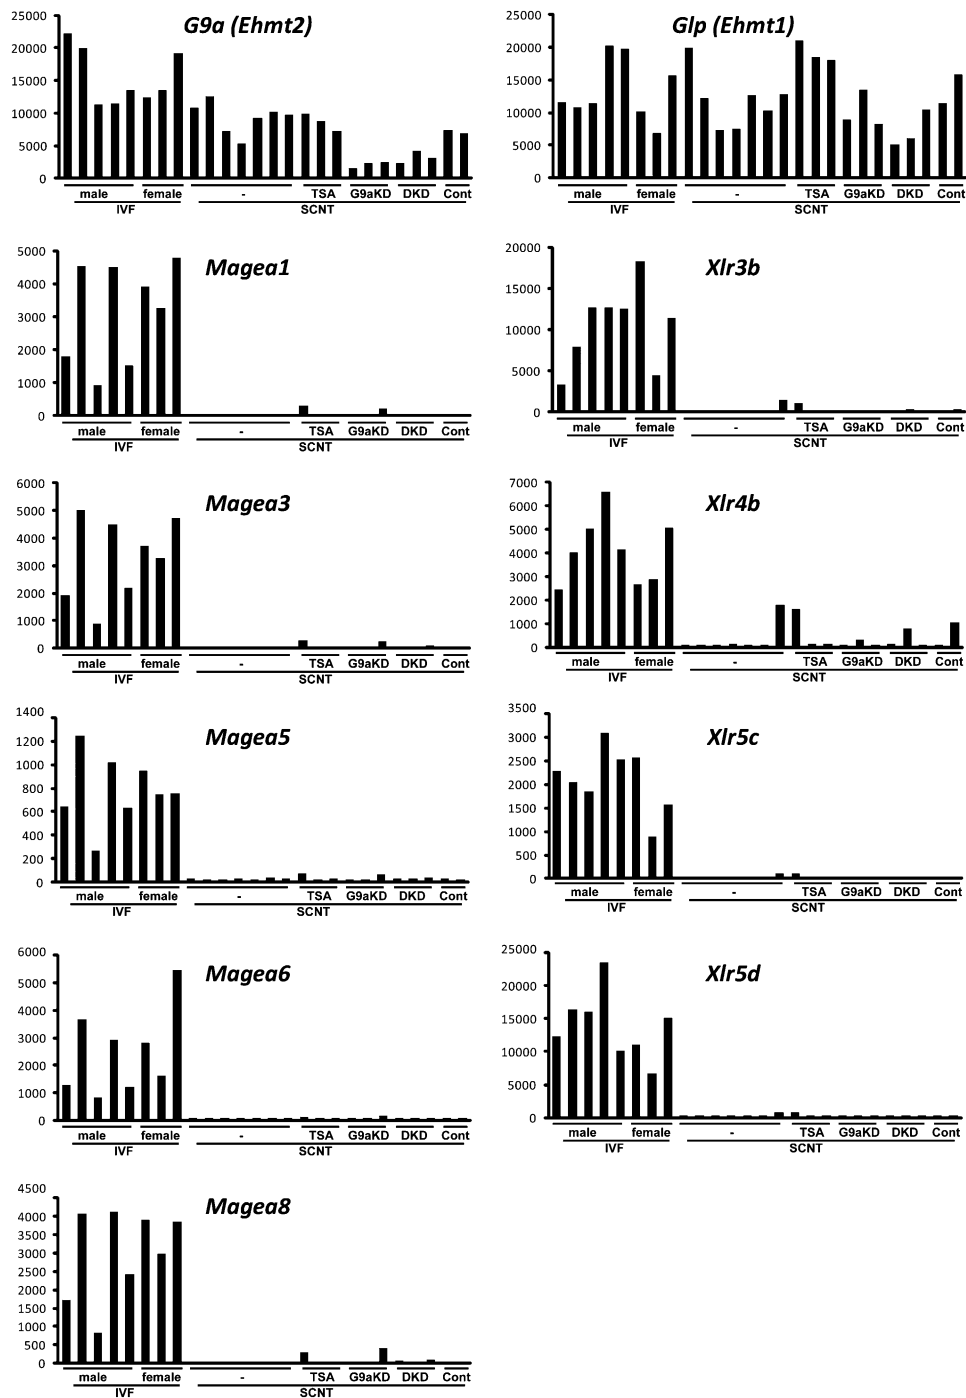

**Fig. S3.** Expression levels of *Xlr* and *Magea* genes in IVF-generated, untreated cumulus cell-derived cloned (-), trichostatin A (TSA)-treated cumulus cell-derived cloned, and siRNA-injected cumulus cell-derived cloned blastocysts. For the siRNA-injected groups, siRNA against *G9a* alone (G9aKD), a combination of two siRNA constructs against *G9a* and *Glp* (DKD), or negative-control siRNA (Cont) was injected. As expected, *G9a* was repressed in both G9aKD and DKD embryos ( $n = 3$ ), and *Glp* was repressed in DKD embryos ( $n = 3$ ). However, the expression levels of the *Xlr* and *Magea* genes examined remained basal. SCNT, somatic cell nuclear transfer.



**Table S2. List of genes with enhancement of their expression levels by *Xist*-siRNA injection in cloned embryos**

| Gene symbol               | Description                                                      | Normalized value of expression level* |               |                   | Fold change ( <i>Xist</i> siRNA vs. control siRNA) | Transcript ID RefSeq/Ensembl |
|---------------------------|------------------------------------------------------------------|---------------------------------------|---------------|-------------------|----------------------------------------------------|------------------------------|
|                           |                                                                  | IVF male                              | Control siRNA | <i>Xist</i> siRNA |                                                    |                              |
| <i>Fras1</i>              | Fraser syndrome 1 homolog                                        | 3.133                                 | -5.609        | -0.489            | 34.758                                             | NM_175473                    |
| <i>Zhx1</i>               | Zinc fingers and homeoboxes 1                                    | -0.003                                | -2.619        | 1.194             | 14.052                                             | NM_001042438                 |
| <i>Car2</i>               | Carbonic anhydrase 2                                             | 2.470                                 | -3.679        | -0.014            | 12.685                                             | NM_009801                    |
| <i>Slc4a4</i>             | BI100969 602886295F1                                             | 1.985                                 | -3.606        | -0.333            | 9.668                                              | BI100969                     |
|                           | NCI_CGAP_Kid14 cDNA clone                                        |                                       |               |                   |                                                    |                              |
| <i>Ccdc120</i>            | Coiled-coil domain containing 120                                | 1.432                                 | -3.249        | -0.314            | 7.648                                              | NM_207202                    |
| <i>Pdk3</i>               | Pyruvate dehydrogenase kinase, isoenzyme 3                       | 2.154                                 | -2.844        | 0.076             | 7.565                                              | NM_145630                    |
| <i>Raver2</i>             | Ribonucleoprotein, PTB-binding 2                                 | 0.790                                 | -2.120        | 0.628             | 6.718                                              | NM_183024                    |
| <i>Bach2</i>              | BTB and CNC homology 2                                           | 2.035                                 | -2.329        | 0.132             | 5.505                                              | NM_001109661                 |
| <i>Tet3</i>               | Tet oncogene family member 3                                     | 0.873                                 | -2.178        | 0.029             | 4.616                                              | NM_183138                    |
| <i>Ly6g6d<sup>†</sup></i> | Lymphocyte antigen 6 complex, locus G6D                          | 0.343                                 | -1.529        | 0.204             | 4.259                                              | NM_033478                    |
| <i>Sestd1<sup>†</sup></i> | SEC14 and spectrin domain 1                                      | 1.071                                 | -1.620        | 0.416             | 4.100                                              | NM_175465                    |
| <i>Tyw3</i>               | tRNA-yW-synthesizing protein 3 homolog                           | 1.121                                 | -1.777        | 0.190             | 3.909                                              | NM_172474                    |
| <i>Igdc3</i>              | RIKEN full-length cDNA 2810401C09                                | 0.329                                 | -1.499        | 0.358             | 3.621                                              | AK012957                     |
| <i>Tmem80</i>             | Transmembrane protein 80                                         | 0.890                                 | -1.699        | -0.001            | 3.246                                              | NM_027797                    |
| <i>Pabpn1</i>             | Poly(A)-binding protein, nuclear 1 gene                          | 0.961                                 | -1.626        | -0.031            | 3.020                                              | ENSMUST00000133397           |
| <i>Mtvr2</i>              | Mammary tumor virus receptor 2                                   | 1.003                                 | -1.341        | 0.242             | 2.997                                              | NM_181452                    |
| <i>B4galt4</i>            | UDP-Gal:betaGlcNAc beta 1,4-galactosyltransferase, polypeptide 4 | 1.207                                 | -1.254        | 0.171             | 2.685                                              | NM_019804                    |
| <i>Ahnak</i>              | AHNAK nucleoprotein (desmoyokin)                                 | 1.085                                 | -1.135        | 0.184             | 2.495                                              | NM_009643                    |
| <i>Ikbkb</i>              | Inhibitor of kappaB kinase beta                                  | 0.623                                 | -1.244        | -0.069            | 2.258                                              | NM_010546                    |
| <i>Tia1</i>               | Cytotoxic granule-associated RNA-binding protein 1               | 0.687                                 | -0.852        | 0.216             | 2.096                                              | NM_011585                    |
| <i>Pacs2</i>              | Phosphofurin acidic cluster sorting protein 2                    | 0.623                                 | -1.042        | -0.134            | 1.877                                              | NM_001081170                 |
| <i>Ccni</i>               | Cyclin I                                                         | 0.351                                 | -0.676        | 0.057             | 1.663                                              | NM_017367                    |
| <i>Gatad1</i>             | GATA zinc finger domain containing 1                             | 0.370                                 | -0.549        | 0.083             | 1.549                                              | NM_026033                    |
| <i>Nid1</i>               | Nidogen 1                                                        | 0.055                                 | -0.364        | 0.208             | 1.487                                              | NM_010917                    |
| <i>Rbbp9</i>              | Retinoblastoma-binding protein 9                                 | 0.401                                 | -0.394        | 0.083             | 1.392                                              | NM_015754                    |
| <i>Trabd</i>              | TraB domain containing                                           | 0.434                                 | -0.296        | 0.095             | 1.311                                              | NM_026485                    |
| <i>Ift52</i>              | Intraflagellar transport 52 homolog ( <i>Chlamydomonas</i> )     | 0.268                                 | -0.289        | 0.070             | 1.283                                              | NM_172150                    |

\*One-way ANOVA with Tukey's post hoc test was applied to the microarray data from IVF ( $n = 4$ ), *Xist*-siRNA-treated ( $n = 7$ ), and control siRNA-treated embryos ( $n = 5$ ). The list consists of genes with a significant ( $P < 0.05$ ) level of down-regulation in control siRNA embryos compared with IVF-generated and *Xist*-siRNA-treated embryos but without a significant difference between the two latter groups.

<sup>†</sup>Mean value of two probes.

**Table S3. In vitro and in vivo development of cloned embryos injected with siRNAs against histone methyltransferases responsible for H3K9 dimethylation**

| siRNA ( $\mu$ M)   | No. cultured | No. cleaved<br>(% of cultured) | No. four-cell embryos |                | Embryos transferred at<br>four-cell stage(ET) | Implanted<br>(% of ET) | Term pups<br>(% of ET) |
|--------------------|--------------|--------------------------------|-----------------------|----------------|-----------------------------------------------|------------------------|------------------------|
|                    |              |                                | (% of cultured)       | (% of cleaved) |                                               |                        |                        |
| Control (10)       | 77           | 59 (76)                        | 30 (38)               | (49)           | 30                                            | 0 (0)                  | 0 (0)                  |
| G9a (5)            | 77           | 46 (60)                        | 31 (40)               | (67)           | 31                                            | 9 (45)                 | 1 (3)                  |
| Glp and G9a (5, 5) | 184          | 128 (70)                       | 92 (50)               | (72)           | 80                                            | 29 (36)                | 1 (1)                  |
